# Supplementary material for: Targeting rehabilitation to improve outcomes after total knee arthroplasty in patients at risk of poor outcomes: randomised controlled trial
Source: PubMed Central journal article supplement (PMC7551789; doi:10.1136/bmj.m3576), 2020-10-13
Supplement: hamd053756.ww.pdf [file hamd053756.ww.pdf]

## Supplemental material

### Characteristics of randomised and not-recruited participants

|                         | <b>Overall</b><br>(n=4264) | <b>Recruited</b><br>(n=334) | <b>not-recruited</b><br>(n=3930) |
|-------------------------|----------------------------|-----------------------------|----------------------------------|
| Sex, n (%) female       | 2399 (56.3)                | 205 (61.4)                  | 2194 (55.8)                      |
| Age, mean (SD)          | 69.54 (9.55)               | 67.52 (9.46)                | 69.72 (9.54)                     |
| Baseline OKS, mean (SD) | 28.39 (8.84)               | 20.24 (4.78)                | 29.21 (8.33)                     |

### Preoperative Oxford Knee Score

|                              | <b>Overall</b><br>(n=153) | <b>Therapist-led</b><br>(n=77) | <b>Home-exercise</b><br>(n=76) |
|------------------------------|---------------------------|--------------------------------|--------------------------------|
| Preoperative OKS, mean (SD)* | 17.06 (7.18)              | 17.86 (7.39)                   | 16.25 (6.91)                   |

\*linked data retrospectively available for patients undergoing TKA in NHS Lothian and NHS Fife

### Timed-get-up-and-go

|                             | <b>Overall</b><br>(n=286) | <b>Therapist-led</b><br>(n=143) | <b>Home-exercise</b><br>(n=143) |
|-----------------------------|---------------------------|---------------------------------|---------------------------------|
| Timed- up-and-go, mean (SD) | 18.58 (60.84)             | 14.65 (38.00)                   | 22.50 (77.16)                   |

Adjusted mean difference\* 4.65 (95%CI -14.3-4.7) p=0.34

\*Adjusting factors: baseline (8-week) timed-get-up-and-go and study centre
